# Supplementary material for: Advancements in Phosphodiesterase 5 Inhibitors: Unveiling Present and Future Perspectives
Source: MDPI journal article supplement (doi:10.3390/ph16091266), 2023-09-06
Supplement: s1 [file s1]

## **Supplementary Material**

### **Advancements in Phosphodiesterase 5 Inhibitors: Unveiling Present and Future Perspectives**

<sup>1</sup>School of Life and Medical Sciences, University of Hertfordshire Hosted by Global Academic Foundation. New Administrative Capital, Cairo 11865, Egypt.

<sup>2</sup>Department of Chemistry, Faculty of Pharmacy, Ahram Canadian University, Cairo, 12451, Egypt.

<sup>3</sup>Department of Pharmaceutical Chemistry, Faculty of Pharmacy and Biotechnology, German University in Cairo, Cairo 11835, Egypt.

#Authors equally contributed to this work

\*Correspondence: [ashraf.abadi@guc.edu.eg](mailto:ashraf.abadi@guc.edu.eg) , Tel +201001588454;

**Table S1: Current on-going clinical trials investigating the effects of PDE5 inhibitors in various diseases**

| Identifier  | Phase  | Intervention                                                  | Targeted disease                                                   | Primary outcome measure(s)                                                                                                                                                                                                                                                                                                                                                                                         |
|-------------|--------|---------------------------------------------------------------|--------------------------------------------------------------------|--------------------------------------------------------------------------------------------------------------------------------------------------------------------------------------------------------------------------------------------------------------------------------------------------------------------------------------------------------------------------------------------------------------------|
| NCT04684589 | II     | Tadalafil 20 mg vs placebo                                    | Obesity                                                            | Thermoneutral FSF of WAT at the level of the umbilicus at 12 Weeks., MRI measurement of lipid content, 12 weeks. Subcutaneous adipose tissue expression of UCP1 (normalized expression units), Measurement of gene expression in adipose sample, 12 weeks.                                                                                                                                                         |
| NCT04039087 | II/III | Sildenafil 40 mg vs placebo                                   | Cystic Fibrosis                                                    | 6 Minute Walk Distance (6MWD), capacity, an objective measurement of exercise tolerance, predicts mortality in patients with CF. Change in distance walked between week 1 and week 12.                                                                                                                                                                                                                             |
| NCT05201144 | II     | Sildenafil oral suspension vs placebo                         | Congenital Diaphragmatic Hernia<br>Pulmonary Hypertension          | Change in Left Ventricular Eccentricity Index (LVEI) on echocardiogram after 14 days of study treatment compared to baseline echocardiogram as compared to placebo.                                                                                                                                                                                                                                                |
| NCT05951413 | II/III | Sildenafil Citrate + estradiol                                | IVF                                                                | Endometrial thickness, measured by transvaginal ultrasound, 10 to 16 days from start of cycle.                                                                                                                                                                                                                                                                                                                     |
| NCT05844462 | III    | Tadalafil vs placebo                                          | Pulmonary Hypertension<br>Chronic Obstructive Pulmonary Disease    | 6-minute Walk; the distance covered in meter during a 6-minute walk at week 16 post-randomization for patients treated with tadalafil compared to placebo, 16 weeks                                                                                                                                                                                                                                                |
| NCT05061368 | II     | Sildenafil Citrate vs placebo                                 | Chronic Obstructive Pulmonary Disease                              | Exercise Capacity and maximal oxygen uptake (peak VO <sub>2</sub> ), within 20-25 minutes post-dose.                                                                                                                                                                                                                                                                                                               |
| NCT05709574 | II     | Tadalafil 20 mg                                               | Gastric Adenocarcinoma<br>Gastroesophageal Junction Adenocarcinoma | Evaluating the safety and tolerability of tadalafil treatment with FLOT chemotherapy                                                                                                                                                                                                                                                                                                                               |
| NCT05558176 | IV     | Sildenafil citrate                                            | Fetal Hypoxia                                                      | Incidence of non-reassuring fetal heart rate patterns; a non-reassuring fetal heart rate pattern will be defined as one or more of the following features; 60 Bradycardia, FHR <110 bpm Tachycardia, FHR > 160bpm Baseline variability < 5 bpm for 30 to 50 minutes OR more than 25 bpm for 15 to 25 minutes.                                                                                                      |
| NCT05556083 | II     | Dapoxetine 3 mg + Sildenafil 50 mg or placebo                 | Premature Ejaculation                                              | Intravaginal latency time changes IVLT using PEDT premature ejaculation diagnostic tool (PEDT), eight weeks for each participant of both groups. Overall partner satisfaction, using Sexual Satisfaction Index (SSI), eight weeks for each participant of both groups                                                                                                                                              |
| NCT05490680 | III    | Sildenafil oral film 25 mg, 50 mg, 75 mg or 100 mg vs placebo | Erectile Dysfunction                                               | Safety of Sildenafil doses versus placebo, Safety of Sildenafil doses versus placebo, i.e., the proportion of subjects with at least one Treatment Emergent Adverse Events (TEAEs) of Special Interest ("Headache" or "Dizziness"), 12 weeks of treatment<br>EEfficacy of Sildenafil oral film versus placebo evaluated using co-primary efficacy endpoint from the change in Erectile Function (EF) domain of the |

|             |        |                               |                                                                                                              |                                                                                                                                                                                                                                                                                                                                                               |
|-------------|--------|-------------------------------|--------------------------------------------------------------------------------------------------------------|---------------------------------------------------------------------------------------------------------------------------------------------------------------------------------------------------------------------------------------------------------------------------------------------------------------------------------------------------------------|
|             |        |                               |                                                                                                              | International Index for Erectile Function (IIEF) questionnaire, baseline to the end of the 12-week treatment period                                                                                                                                                                                                                                           |
| NCT05275725 | I      | Sildenafil                    | Birth Asphyxia                                                                                               | Maximum tolerable dose of sildenafil, within 30 days of drug administration                                                                                                                                                                                                                                                                                   |
| NCT05266651 | II/III | Tadalafil 5 mg vs placebo     | Sexual Dysfunction                                                                                           | Clitoral Artery Doppler, Pulsatile index, Resistance index and Peak systolic velocity after one month duration of drug use.                                                                                                                                                                                                                                   |
| NCT05206955 | III    | Tadalafil vs placebo          | Fontan Palliation                                                                                            | Microvascular endothelial function measured by the reactive hyperemic index using peripheral artery tonometry (EndoPAT), 52 weeks.<br>Pulmonary vascular reserve; the slope of mean pulmonary artery pressure / cardiac output (mPAP/CO), 52 weeks.                                                                                                           |
| NCT05195775 | II/III | Tadalafil                     | Duchenne Muscular Dystrophy                                                                                  | Change in post-contractile BOLD response after tadalafil dosing. MRI technique to measure microvascular function in skeletal muscle, done 3 hours after dosing/no-dosing on two separate study visits.<br>Change in post-exercise hyperemia after tadalafil dosing using Doppler ultrasound done 3 hours after dosing/no-dosing on two separate study visits. |
| NCT05173896 | II     | Tadalafil 20 mg vs placebo    | Cerebral Small Vessel Diseases<br>Stroke, Ischemic                                                           | Feasibility of treatment defined as proportion of participants achieving full target dose of tadalafil/placebo., Number of participants achieving full target dose of tadalafil/placebo by end of three months trial period.                                                                                                                                  |
| NCT05030623 | I/ II  | Tadalafil 5 mg vs placebo     | Major Depressive Disorder                                                                                    | Effect on Hamilton Depression rating scale score (HAM-D score), Remission is defined as HAM-D total score 7 (primary outcome). Treatment response is defined as 50% drop in the HAM-D total score., 12 weeks.                                                                                                                                                 |
| NCT04908657 | IV     | Sildenafil 20 mg              | Liver Fibrosis                                                                                               | Liver MRI, Intra-voxel incoherent motion (IVIM) imaging, from baseline to 3 years.                                                                                                                                                                                                                                                                            |
| NCT04797286 | II     | Sildenafil vs placebo         | Scleroderma<br>Mildly Elevated<br>Pulmonary Pressures                                                        | Difference in change in distance walked in 6-minute walk test (6MWT) at 4 months.                                                                                                                                                                                                                                                                             |
| NCT04565925 | II     | Sildenafil Citrate vs placebo | Spinal Cord Injuries<br>Urinary Incontinence                                                                 | Bladder Leakage as measured by 5-day bladder diary, which will be kept for five 24 hours periods for 4 weeks of sildenafil treatment                                                                                                                                                                                                                          |
| NCT04538976 | IV     | Sildenafil                    | Acute Exacerbation of COPD                                                                                   | Time alive and out of hospital, 365 days                                                                                                                                                                                                                                                                                                                      |
| NCT04447989 | II     | Sildenafil vs placebo         | Bronchopulmonary Dysplasia of Newborn                                                                        | Safety as determined by incidence of hypotension experienced by the participants through 28 days post last dose of study drug.                                                                                                                                                                                                                                |
| NCT04356716 | II     | Sildenafil                    | Choroidal Ischemia -<br>Age-related Macular Degeneration - Central Serous Retinopathy - Retinitis Pigmentosa | Change in Choroidal Perfusion; patients are evaluated for progression of disease/dystrophy via visual acuity (improved/stable/worsened) and appearance of fluid layer and drusen on OCT testing, up to 5 Years                                                                                                                                                |
| NCT03686306 | III    | Sildenafil vs placebo         | Peripheral Artery Disease                                                                                    | Absolute change of the absolute claudication distance (ACD) from baseline to week 24; Baseline and week 24                                                                                                                                                                                                                                                    |
| NCT02682147 | IV     | Sildenafil                    | Emphysema                                                                                                    | Perfused blood volume assessed by CT scan at two time points and compared at two points, pre and post the administration of sildenafil.                                                                                                                                                                                                                       |

|             |     |                                                             |                                  |                                                                                                                                                                                                                                                         |
|-------------|-----|-------------------------------------------------------------|----------------------------------|---------------------------------------------------------------------------------------------------------------------------------------------------------------------------------------------------------------------------------------------------------|
| NCT04039464 | III | Mono-Therapy with Sildenafil vs combination with Bosentan   | Pediatric Pulmonary Hypertension | Change in WHO functional class of pulmonary hypertension per participant in each arm (Mono vs. Dual Therapy); Baseline, 12 months.                                                                                                                      |
| NCT05014776 | II  | Tadalafil + Pembrolizumab + Ipilimumab                      | Pancreatic Cancer                | Objective response rate (irORR) using immune Response Evaluation Criteria for Solid Tumors (iRECIST); irORR is defined as the number of patients achieving a complete response (irCR) or partial response (irPR) based on the immune Response, 4 years. |
| NCT05051436 | IV  | Mirabegron 50 mg + Tadalafil 10 mg or placebo               | Pre-diabetes<br>Obesity          | Oral glucose tolerance test using 75 g of glucose at baseline and at 14 weeks and blood glucose will be measured.                                                                                                                                       |
| NCT05183334 | IV  | Tramadol hydrochloride 100 mg + Sildenafil 50 mg or placebo | Premature Ejaculation            | Score of sexual satisfaction, 8 weeks.                                                                                                                                                                                                                  |
